# Supplementary material for: Changes in body mass index, weight, and waist-to-hip ratio over five years in HIV-positive individuals in the HIV Heart Aging Study compared to the general population
Source: Springer Nature journal article supplement (doi:10.1007/s15010-023-02009-8), 2023-03-17
Supplement: MOESM2 [file 24637562]

# **Changes in body mass index, weight, and waist-to-hip ratio over five years in HIV-positive individuals in the HIV Heart Aging Study compared to the general population**

## **Infection**

### **Authors:**

Laven Mavarani<sup>1</sup>, Sarah Albayrak-Rena<sup>2</sup>, Anja Potthoff<sup>3</sup>, Martin Hower<sup>4</sup>, Sebastian Dolf<sup>5</sup>, Stefanie Sammet<sup>2</sup>, Felix Maischack<sup>2</sup>, Dirk Schadendorf<sup>2</sup>, Børge Schmidt<sup>1</sup>, Stefan Esser<sup>2,6</sup> on behalf of HIV HEART AGING Study

### **Affiliations:**

<sup>1</sup> Institute for Medical Informatics, Biometry and Epidemiology (IMIBE), University Hospital Essen, Essen, Germany

<sup>2</sup> Department of Dermatology and Venereology, HIV Outpatient Clinic, University Hospital Essen, Essen, Germany

<sup>3</sup> Interdisciplinary Immunological Outpatient Clinic, Center for Sexual Health and Medicine, Department of Dermatology, Venereology and Allergology, Ruhr University Bochum, Bochum, Germany

<sup>4</sup> Department of Pneumology, Infectious Diseases and Internal Medicine, Klinikum Dortmund, Hospital University Witten/ Herdecke, Dortmund, Germany

<sup>5</sup> Department of Infectious Diseases, University Hospital Essen, Essen, Germany

<sup>6</sup> Institute for translational HIV research, University Hospital Essen, Essen, Germany

**Corresponding author:**

Stefan Esser, MD, Clinic for Dermatology and Venerology, University Hospital Essen, University of Duisburg-Essen, Hufelandstr. 55, Essen 45122, Germany

Telephone: +49 201 723 3878, Fax.: +49 201 723 3845, e-mail: stefan.esser@uk-essen.de

Online Resource 5: HIVH HIV-specific characteristics stratified by relative weight change within 5 years of  $\geq 10\%$ ,  $<10\%$  to  $>-10\%$ , and  $\leq -10\%$

|                                      |                             | HIVH weight change within 5 years $\geq 10\%$ |                       |               |                       | HIVH weight change within 5 years $<10\%$ to $>-10\%$ |                       |               |                       | HIVH weight change within 5 years $\leq -10\%$ |                       |               |                       |
|--------------------------------------|-----------------------------|-----------------------------------------------|-----------------------|---------------|-----------------------|-------------------------------------------------------|-----------------------|---------------|-----------------------|------------------------------------------------|-----------------------|---------------|-----------------------|
|                                      |                             | Baseline                                      |                       | after 5 years |                       | Baseline                                              |                       | after 5 years |                       | Baseline                                       |                       | after 5 years |                       |
|                                      |                             | N                                             | n (%) / MEAN $\pm$ SD | N             | n (%) / MEAN $\pm$ SD | N                                                     | n (%) / MEAN $\pm$ SD | N             | n (%) / MEAN $\pm$ SD | N                                              | n (%) / MEAN $\pm$ SD | N             | n (%) / MEAN $\pm$ SD |
| <b>age at HIV-infection</b>          | <b>[years]</b>              | 78                                            | 38.7 $\pm$ 7.2        | 78            | 38.7 $\pm$ 7.2        | 499                                                   | 40.6 $\pm$ 9.3        | 499           | 40.6 $\pm$ 9.3        | 33                                             | 41.8 $\pm$ 9.9        | 33            | 41.8 $\pm$ 9.9        |
| <b>ethnicity</b>                     | <b>caucasian</b>            | 79                                            | 69 (87.3 %)           | 79            | 69 (87.3 %)           | 509                                                   | 469 (92.1 %)          | 509           | 469 (92.1 %)          | 34                                             | 33 (97.1 %)           | 34            | 33 (97.1 %)           |
|                                      | <b>african</b>              | 79                                            | 2 (2.5 %)             | 79            | 2 (2.5 %)             | 509                                                   | 8 (1.6 %)             | 509           | 8 (1.6 %)             | 34                                             | 0                     | 34            | 0                     |
|                                      | <b>asian</b>                | 79                                            | 2 (2.5 %)             | 79            | 2 (2.5 %)             | 509                                                   | 4 (0.8 %)             | 509           | 4 (0.8 %)             | 34                                             | 1 (2.9 %)             | 34            | 1 (2.9 %)             |
|                                      | <b>other</b>                | 79                                            | 6 (7.6 %)             | 79            | 6 (7.6 %)             | 509                                                   | 28 (5.5 %)            | 509           | 28 (5.5 %)            | 34                                             | 0                     | 34            | 0                     |
| <b>way of HIV transmission</b>       | <b>MSM</b>                  | 75                                            | 39 (52.0 %)           | 75            | 39 (52.0 %)           | 483                                                   | 309 (64.0 %)          | 483           | 309 (64.0 %)          | 34                                             | 23 (67.7 %)           | 34            | 23 (67.7 %)           |
|                                      | <b>hetero</b>               | 75                                            | 24 (32.0 %)           | 75            | 24 (32.0 %)           | 483                                                   | 104 (21.5 %)          | 483           | 104 (21.5 %)          | 34                                             | 9 (26.5 %)            | 34            | 9 (26.5 %)            |
|                                      | <b>intravenous drug use</b> | 75                                            | 5 (6.7 %)             | 75            | 5 (6.7 %)             | 483                                                   | 33 (6.8 %)            | 483           | 33 (6.8 %)            | 34                                             | 2 (5.9 %)             | 34            | 2 (5.9 %)             |
|                                      | <b>transfusion</b>          | 75                                            | 2 (2.7 %)             | 75            | 2 (2.7 %)             | 483                                                   | 10 (2.1 %)            | 483           | 10 (2.1 %)            | 34                                             | 0                     | 34            | 0                     |
|                                      | <b>epidemic area</b>        | 75                                            | 5 (6.7 %)             | 75            | 5 (6.7 %)             | 483                                                   | 27 (5.6 %)            | 483           | 27 (5.6 %)            | 34                                             | 0                     | 34            | 0                     |
|                                      | <b>other</b>                | 75                                            | 0                     | 75            | 0                     | 483                                                   | 0                     | 483           | 0                     | 34                                             | 0                     | 34            | 0                     |
| <b>HIV categorie (immonological)</b> | <b>HIV I</b>                | 77                                            | 3 (3.9 %)             | 78            | 2 (2.6 %)             | 484                                                   | 21 (4.3 %)            | 508           | 14 (2.8 %)            | 32                                             | 1 (3.1 %)             | 34            | 1 (2.9 %)             |
|                                      | <b>HIV II</b>               | 77                                            | 39 (50.7 %)           | 78            | 39 (50.0 %)           | 484                                                   | 212 (43.8 %)          | 508           | 216 (42.5 %)          | 32                                             | 10 (31.3 %)           | 34            | 11 (32.4 %)           |
|                                      | <b>HIV III</b>              | 77                                            | 35 (45.5 %)           | 78            | 37 (47.4 %)           | 484                                                   | 251 (51.9 %)          | 508           | 278 (54.7 %)          | 32                                             | 21 (65.6 %)           | 34            | 22 (64.7 %)           |

|                                     |                               |            |              |             |             |             |                 |              |                |           |                  |            |              |
|-------------------------------------|-------------------------------|------------|--------------|-------------|-------------|-------------|-----------------|--------------|----------------|-----------|------------------|------------|--------------|
| <b>HIV categorie (clinical)</b>     | <b>HIV A</b>                  | 77         | 32 (41.6 %)  | 78          | 31 (39.7 %) | 484         | 159 (32.9 %)    | 508          | 147 (28.9 %)   | 32        | 9 (28.1 %)       | 34         | 9 (26.5 %)   |
|                                     | <b>HIV B</b>                  | 77         | 19 (24.7 %)  | 78          | 20 (25.6 %) | 484         | 160 (33.1 %)    | 508          | 174 (34.3 %)   | 32        | 9 (28.1 %)       | 34         | 9 (26.5 %)   |
|                                     | <b>HIV C / AIDS</b>           | 77         | 26 (33.8 %)  | 78          | 27 (34.6 %) | 484         | 165 (34.1 %)    | 508          | 187 (36.8 %)   | 32        | 14 (43.8 %)      | 34         | 16 (47.1 %)  |
| <b>CD4/CD8 ratio</b>                |                               | 79         | 0.82 ± 0.42  | 79          | 0.88 ± 0.41 | 504         | 0.8 ± 0.44      | 505          | 1.02 ± 2.11    | 33        | 0.83 ± 0.41      | 33         | 0.92 ± 0.6   |
| <b>viral load</b>                   | <b>[copies/ml]</b>            | 79         | 46.9 ± 107.5 | 79          | 36.5 ± 65.9 | 509         | 707.3 ± 10365.8 | 508          | 213.7 ± 3945.8 | 34        | 4382.5 ± 25372.9 | 34         | 44.3 ± 104.8 |
| <b>viral load &lt; 50 copies/ml</b> | <b>yes</b>                    | 79         | 73 (92.4 %)  | 79          | 72 (91.1 %) | 509         | 474 (93.1 %)    | 509          | 479 (94.1 %)   | 34        | 31 (91.2 %)      | 34         | 32 (94.12%)  |
| <b>duration of HIV infection</b>    | <b>[years]</b>                | 78         | 13.2 ± 6.2   | 78          | 18.5 ± 6.2  | 499         | 14.1 ± 6.7      | 499          | 19.3 ± 6.7     | 33        | 14.9 ± 6.9       | 33         | 19.8 ± 7.0   |
| <b>ART medication categories</b>    | <b>NRTIs</b>                  | 78         | 74 (94.9 %)  | 79          | 72 (91.1 %) | 498         | 468 (94.0 %)    | 501          | 452 (90.2 %)   | 33        | 31 (93.9 %)      | 34         | 33 (97.1 %)  |
|                                     | <b>NRTIs:TAF</b>              | 78         | 0            | 79          | 34 (43.0 %) | 498         | 5 (1 %)         | 501          | 210 (41.9 %)   | 33        | 0                | 34         | 9 (26.47 %)  |
|                                     | <b>NNRTIs</b>                 | 78         | 33 (42.3 %)  | 79          | 21 (26.6 %) | 498         | 235 (47.2 %)    | 501          | 192 (38.3 %)   | 33        | 12 (36.4 %)      | 34         | 10 (29.4 %)  |
|                                     | <b>INSTIs</b>                 | 78         | 12 (15.4 %)  | 79          | 51 (64.6 %) | 498         | 73 (14.7 %)     | 501          | 234 (46.7 %)   | 33        | 3 (9.1 %)        | 34         | 11 (32.4 %)  |
|                                     | <b>PIs</b>                    | 78         | 39 (50.0 %)  | 79          | 15 (19.0 %) | 498         | 238 (47.8 %)    | 501          | 141 (28.1 %)   | 33        | 18 (54.5 %)      | 34         | 17 (50.0 %)  |
|                                     | <b>boost</b>                  | 78         | 28 (35.9 %)  | 79          | 18 (22.8 %) | 498         | 174 (34.9 %)    | 501          | 155 (30.9 %)   | 33        | 10 (30.3 %)      | 34         | 12 (35.3 %)  |
|                                     | <b>entry inhibitor</b>        | 78         | 3 (3.8 %)    | 79          | 3 (3.8 %)   | 498         | 13 (2.6 %)      | 501          | 15 (3.0 %)     | 33        | 1 (3.0 %)        | 34         | 2 (5.9 %)    |
|                                     | <b>combination medication</b> | 78         | 55 (70.5 %)  | 79          | 29 (36.7 %) | 498         | 355 (71.3 %)    | 501          | 231 (46.1 %)   | 33        | 24 (72.7 %)      | 34         | 20 (58.8 %)  |
| <b>single tablet regime</b>         | 78                            | 15 (19.2%) | 79           | 41 (51.7 %) | 498         | 82 (16.5 %) | 501             | 208 (41.5 %) | 33             | 3 (9.1 %) | 34               | 8 (23.5 %) |              |
| <b>Lipodystrophy</b>                | <b>yes</b>                    | 75         | 13 (17.3 %)  | 79          | 17 (21.5 %) | 478         | 101 (21.1 %)    | 508          | 115 (22.6 %)   | 31        | 10 (32.3 %)      | 34         | 9 (26.5 %)   |
| <b>Lipoatrophy</b>                  | <b>yes</b>                    | 76         | 9 (11.8 %)   | 79          | 10 (12.7 %) | 480         | 109 (22.7 %)    | 509          | 108 (21.2 %)   | 31        | 5 (16.1 %)       | 34         | 7 (20.6 %)   |
| <b>Lipohypertrophy</b>              | <b>yes</b>                    | 76         | 7 (9.2 %)    | 78          | 5 (6.4 %)   | 415         | 50 (10.4 %)     | 508          | 43 (8.5 %)     | 31        | 7 (22.6 %)       | 34         | 6 (17.7 %)   |
